# Supplementary material
Source: publisher site journal article supplement (https://www.dovepress.com/article/363563)
Supplement: Supplementary file 1 [file get_supplementary_file.php]

Appendix 1

**Physician Satisfaction Questionnaire**

Please rate your satisfaction for each question below:

1. How easy was it to set up the device?

**Very difficult Very easy**

**1 2 3 4 5**

2. Was the device easy to use?

**Very difficult Very easy**

**1 2 3 4 5**

3. How much did it improve needle tip visualization?

**Not at all Very much**

**1 2 3 4 5**

4. How much did it reduce the amount of needle manipulations?

**Not at all Very much**

**1 2 3 4 5**

5. How much did it reduce image quality?

**Not at all Very much**

**1 2 3 4 5**

6. How much easier was it to perform the block?

**Not at all Much easier**

**1 2 3 4 5**

7. Would you use it again?

**Never Definitely**

**1 2 3 4 5**

8. Would you prefer it for all in-plane blocks?

**Not at all Definitely**

**1 2 3 4 5**
